# Supplementary material for: Prevalence of Shigella boydii in Bangladesh: Isolation and Characterization of a Rare Phage MK-13 That Can Robustly Identify Shigellosis Caused by Shigella boydii Type 1
Source: Front Microbiol. 2019 Nov 7;10:2461. doi: 10.3389/fmicb.2019.02461 (PMC6853846; doi:10.3389/fmicb.2019.02461)
Supplement: Supplementary file 3 [file Table_3.XLS]

## Sheet: Sheet1
Supplementary Table 3: List of available Shigella phage genomes within NCBI with their accession numbers.
Phage Name	Accession Number
75/02 Stx	NC_029120.1
phiSboM-AG3	FJ373894.1
POCJ13	NC_025434.1
pSb-1	NC_023589.1
pSf-1	NC_021331.1
pSf-2	KP085586.1
pSs-1	KM501444.1
Sf13	MF158040.1
Sf14	MF327003.1
Sf15	MF158041.1
Sf16	MF158043.1
Sf17	MF327004.1
Sf18	MF158044.1
Sf19	MF327005.1
Sf20	MF327006.1
Sf21	MF327007.1
Sf22	MF158045.1
Sf23	MF158046.1
Sf24	MF327008.1
Sf25	MF327009.1
SH6	KX828710.1
SH7	KX828711.1
SHBML-50-1	KX130864.1
Shf125875	NC_025437.1
Shfl1	NC_015456.1
Shfl2	NC_015457.1
SHFML-11	NC_030953.1
SHFML-26	NC_031011.1
SHSML-45	NC_031022.1
SHSML-52-1	NC_031090.1
SP18	NC_014595.1
SSP1	KY963424.1
Ss-VASD	NC_028685.1
vB_SflS-ISF001	MG049919.1
vB_SsoS-ISF002	MF093736.1
